# Supplementary material for: Unraveling interphase-driven failure pathways in LiMn 0.6 Fe 0.4 PO 4 /graphite pouch cells
Source: Royal Society of Chemistry journal article supplement (doi:10.1039/d5eb00228a), 2026-01-01
Supplement: d5eb00228a1.pdf [file d5eb00228a1.pdf]

## Supplementary Information for

### Unraveling Interphase-Driven Failure Pathways in $\text{LiMn}_{0.6}\text{Fe}_{0.4}\text{PO}_4$ /Graphite Pouch Cells

Chanmonirath (Michael) Chak<sup>a</sup>, Vadim Shipitsyn<sup>a</sup>, Ruiyi Song<sup>b</sup>, Glenn Pastel<sup>c\*</sup>, Wenhua Zuo<sup>d</sup>, Yuwei Zhu<sup>e</sup>, Gui-Liang Xu<sup>d</sup>, Linqin Mu<sup>e</sup>, Lin Ma<sup>a\*</sup>

- a. Department of Applied Physical Sciences, University of North Carolina at Chapel Hill, Chapel Hill, NC 27514, USA
- b. DP Technology, Delaware, USA
- c. Battery Sciences Branch, DEVCOM Army Research Laboratory, Adelphi, MD 20783, USA
- d. Chemical Sciences and Engineering Division, Argonne National Laboratory, Lemont, IL 60439 USA
- e. Materials Science Engineering, School of Engineering for Matter, Transport, and Energy, Arizona State University, Tempe, AZ 85281, USA

E-mail: [glenn.r.pastel.civ@army.mil](mailto:glenn.r.pastel.civ@army.mil); [l.ma@unc.edu](mailto:l.ma@unc.edu)

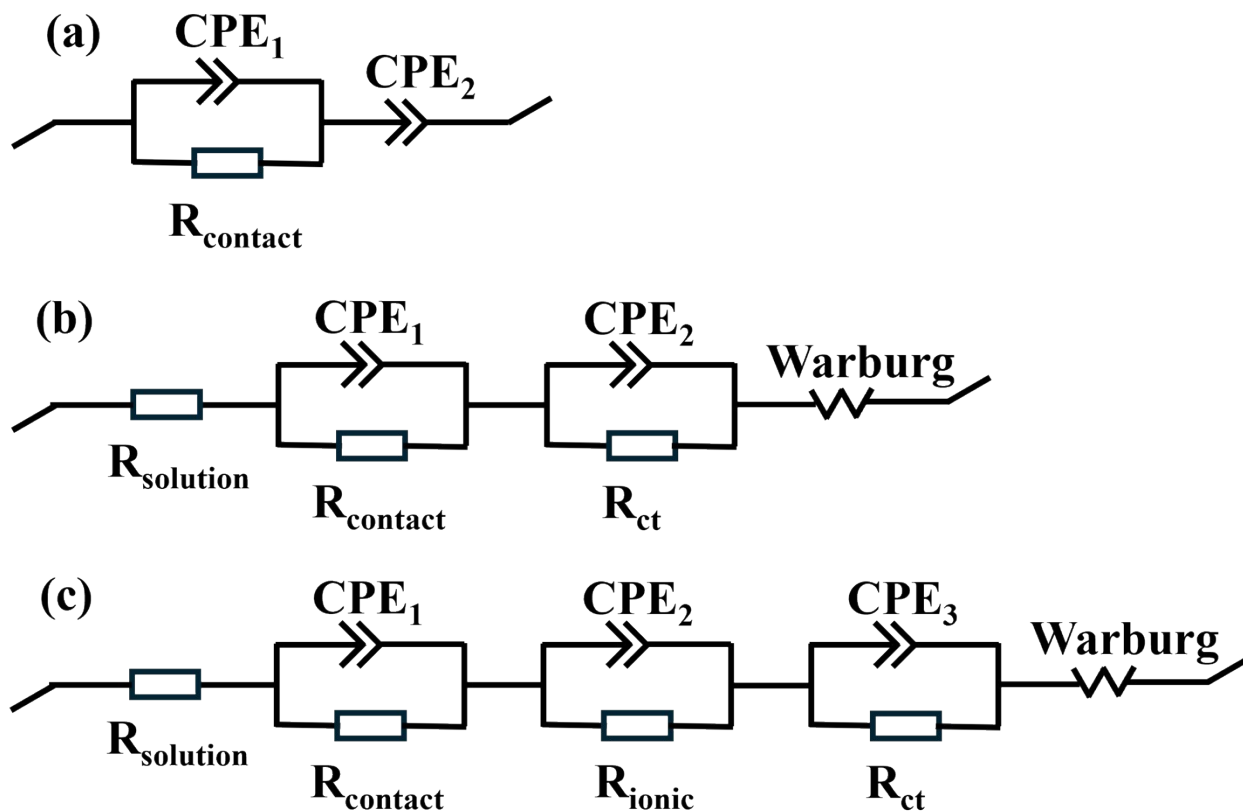

**Figure S1.** Equivalent circuit models used for fitting for (a) the contact resistance<sup>1-3</sup> (**Figure S2**), (b) negative symmetric cells<sup>2-5</sup>, and (c) positive symmetric cells, full coin cells, and pouch cells<sup>4, 5</sup>.  $R_{solution}$  is solution resistance,  $R_{contact}$  is contact resistance,  $R_{ct}$  is charge transfer resistance, CPE is constant phase element, W is Warburg circuit element.

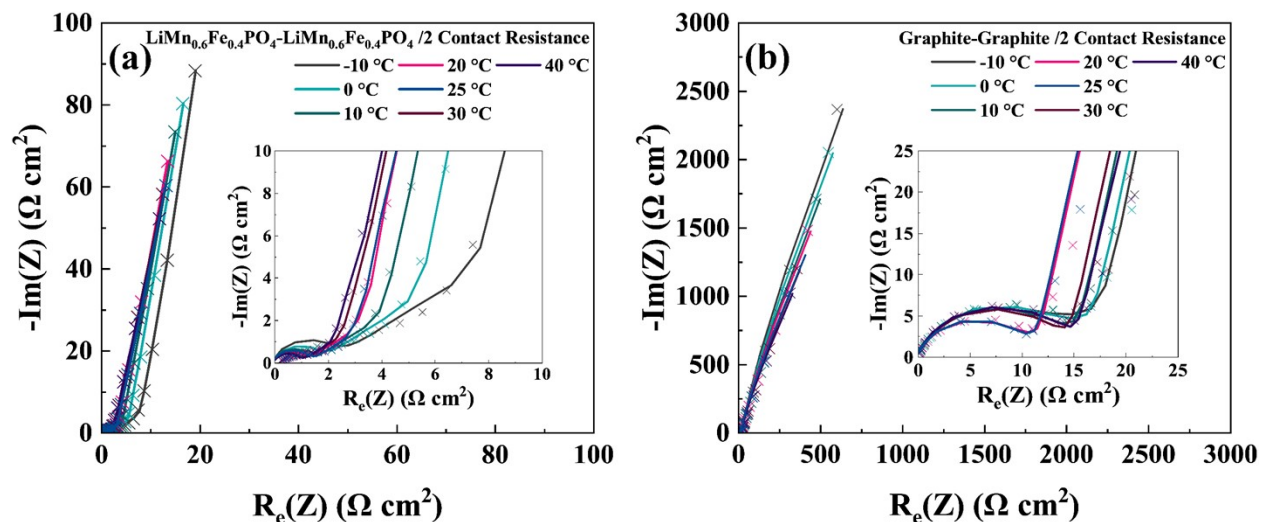

**Figure S2.** Area specific Nyquist plots of blocking (a) LiMn<sub>0.6</sub>Fe<sub>0.4</sub>PO<sub>4</sub> cathode ((+/+)/2) and (b) graphite anode ((-/-)/2) symmetric cells at different temperatures. The cells were fabricated using electrodes punched from fresh LiMn<sub>0.6</sub>Fe<sub>0.4</sub>PO<sub>4</sub>/graphite pouch cells. Experimental data are shown as solid line and fitted data are shown as cross symbols, using the equivalent circuit in **Figure S1a**. The average contact resistance ( $R_{\text{contact}}$ ) of LiMn<sub>0.6</sub>Fe<sub>0.4</sub>PO<sub>4</sub> cathode and graphite anode were determined to be 4.53 Ω cm<sup>2</sup> and 14.05 Ω cm<sup>2</sup>, respectively.

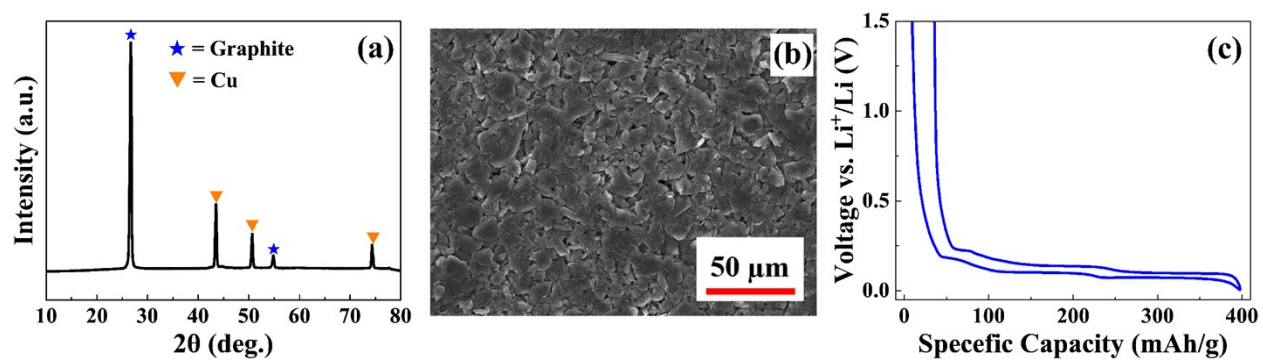

**Figure S3.** Characterizations of graphite anode material. (a) XRD pattern and (b) SEM image of pristine graphite electrode. (c) Voltage vs. specific capacity curve of graphite/Li half cell cycled at C/20 and  $25^\circ\text{C}$ .

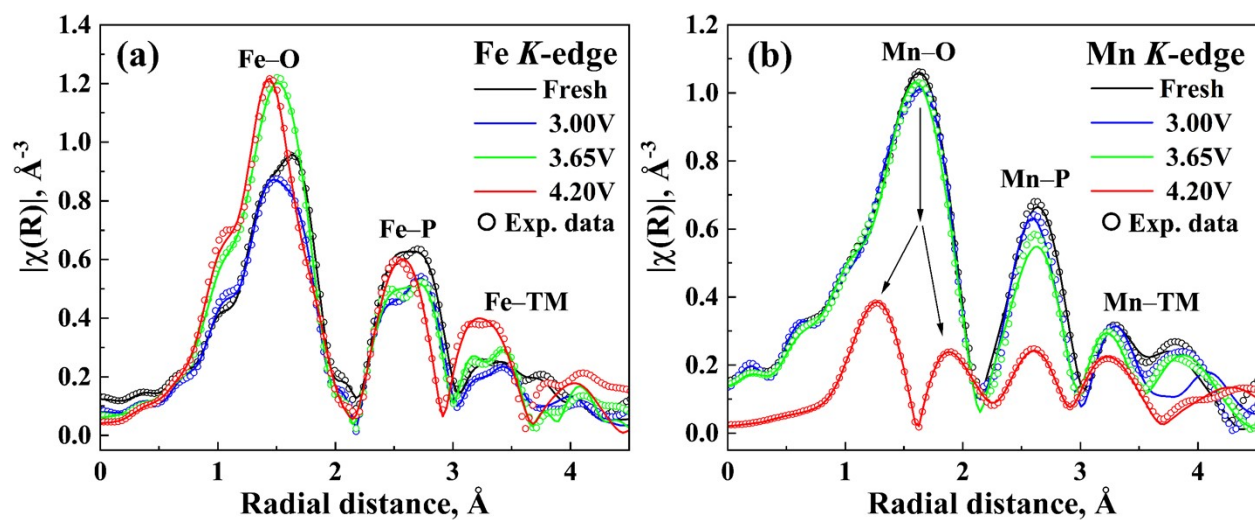

**Figure S4.** *Ex-situ* EXAFS spectra of (a) Fe K-edge and (b) Mn K-edge in  $\text{LiMn}_{0.6}\text{Fe}_{0.4}\text{PO}_4$  electrode at different voltages.

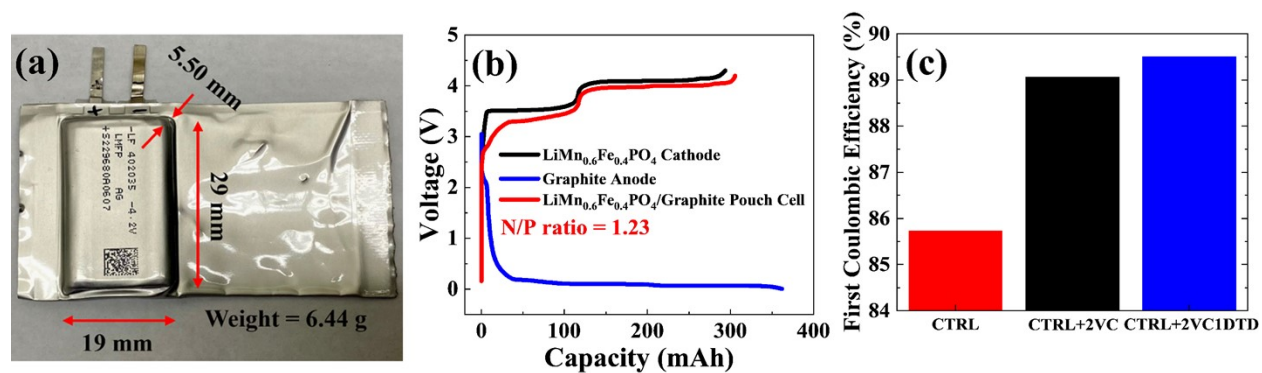

**Figure S5.** (a) LiMn<sub>0.6</sub>Fe<sub>0.4</sub>PO<sub>4</sub>/graphite pouch cell, (b) voltage vs. capacity curves of LiMn<sub>0.6</sub>Fe<sub>0.4</sub>PO<sub>4</sub> cathode, graphite anode, and LiMn<sub>0.6</sub>Fe<sub>0.4</sub>PO<sub>4</sub>/graphite pouch cell, displaying N/P ratio of 1.23, (c) first-cycle Coulombic efficiency of LiMn<sub>0.6</sub>Fe<sub>0.4</sub>PO<sub>4</sub>/graphite pouch cells during formation.

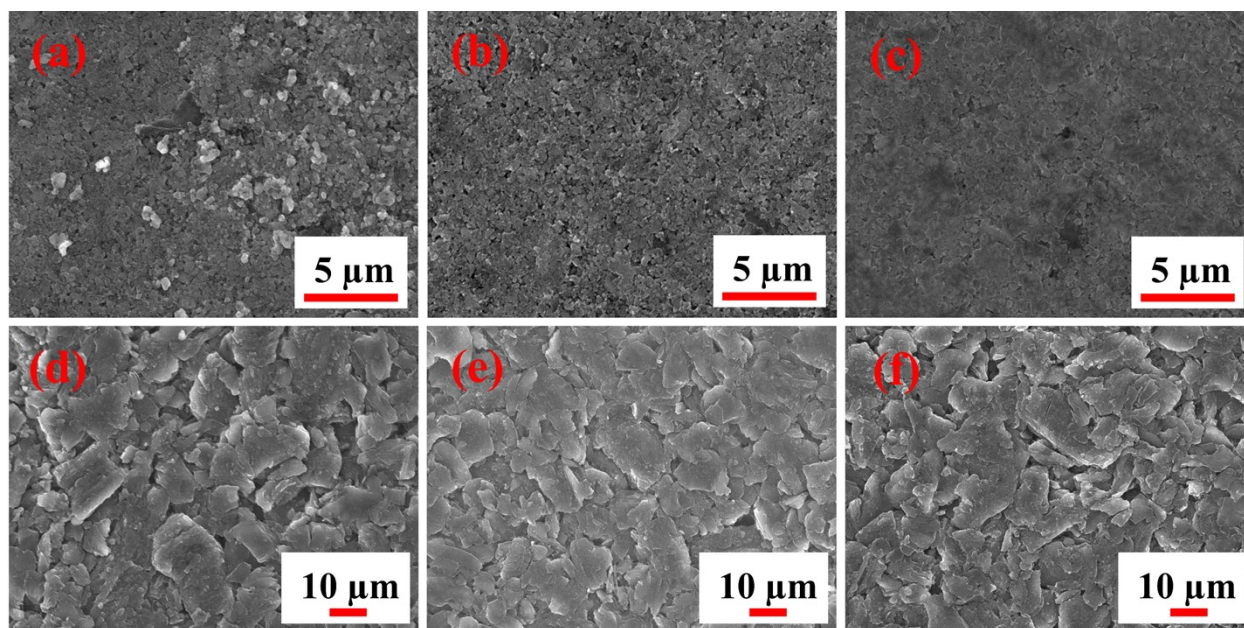

**Figure S6.** SEM images of (a-c) LiMn<sub>0.6</sub>Fe<sub>0.4</sub>PO<sub>4</sub> cathode and (d-f) graphite anode after long-term cycling with different electrolytes including (a, d) CTRL, (b, e) CTRL + 2% VC, and (c, f) CTRL + 2% VC + 1% DTD electrolytes.

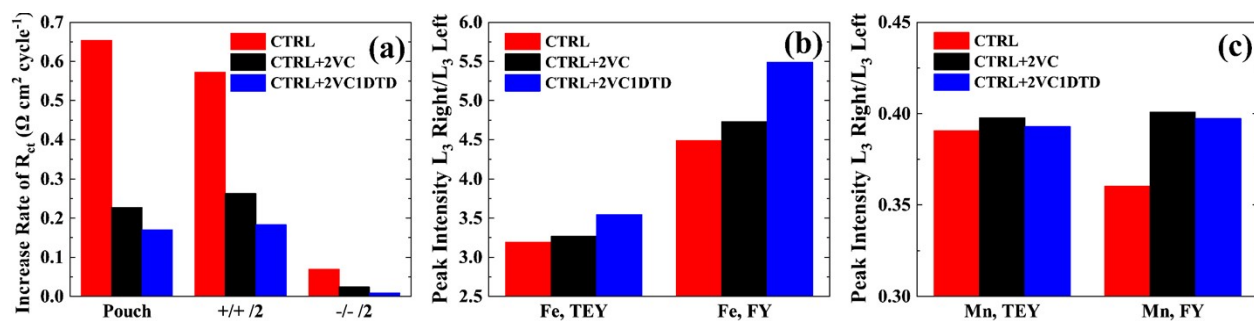

**Figure S7.** (a) Increase rate of  $R_{ct}$  per cycle for  $\text{LiMn}_{0.6}\text{Fe}_{0.4}\text{PO}_4$ /graphite pouch cell,  $\text{LiMn}_{0.6}\text{Fe}_{0.4}\text{PO}_4$  cathode ((+ / +) / 2) and (b) graphite anode ((- / -) / 2) symmetric cells. (b) The Fe L3-edge has two peaks, and the intensity ratio between the right peak and the left peak is plotted as a function of the labeled conditions. (c) The Mn L3-edge has two peaks, and the intensity ratio between the right peak and the left peak is plotted as a function of the labeled conditions.



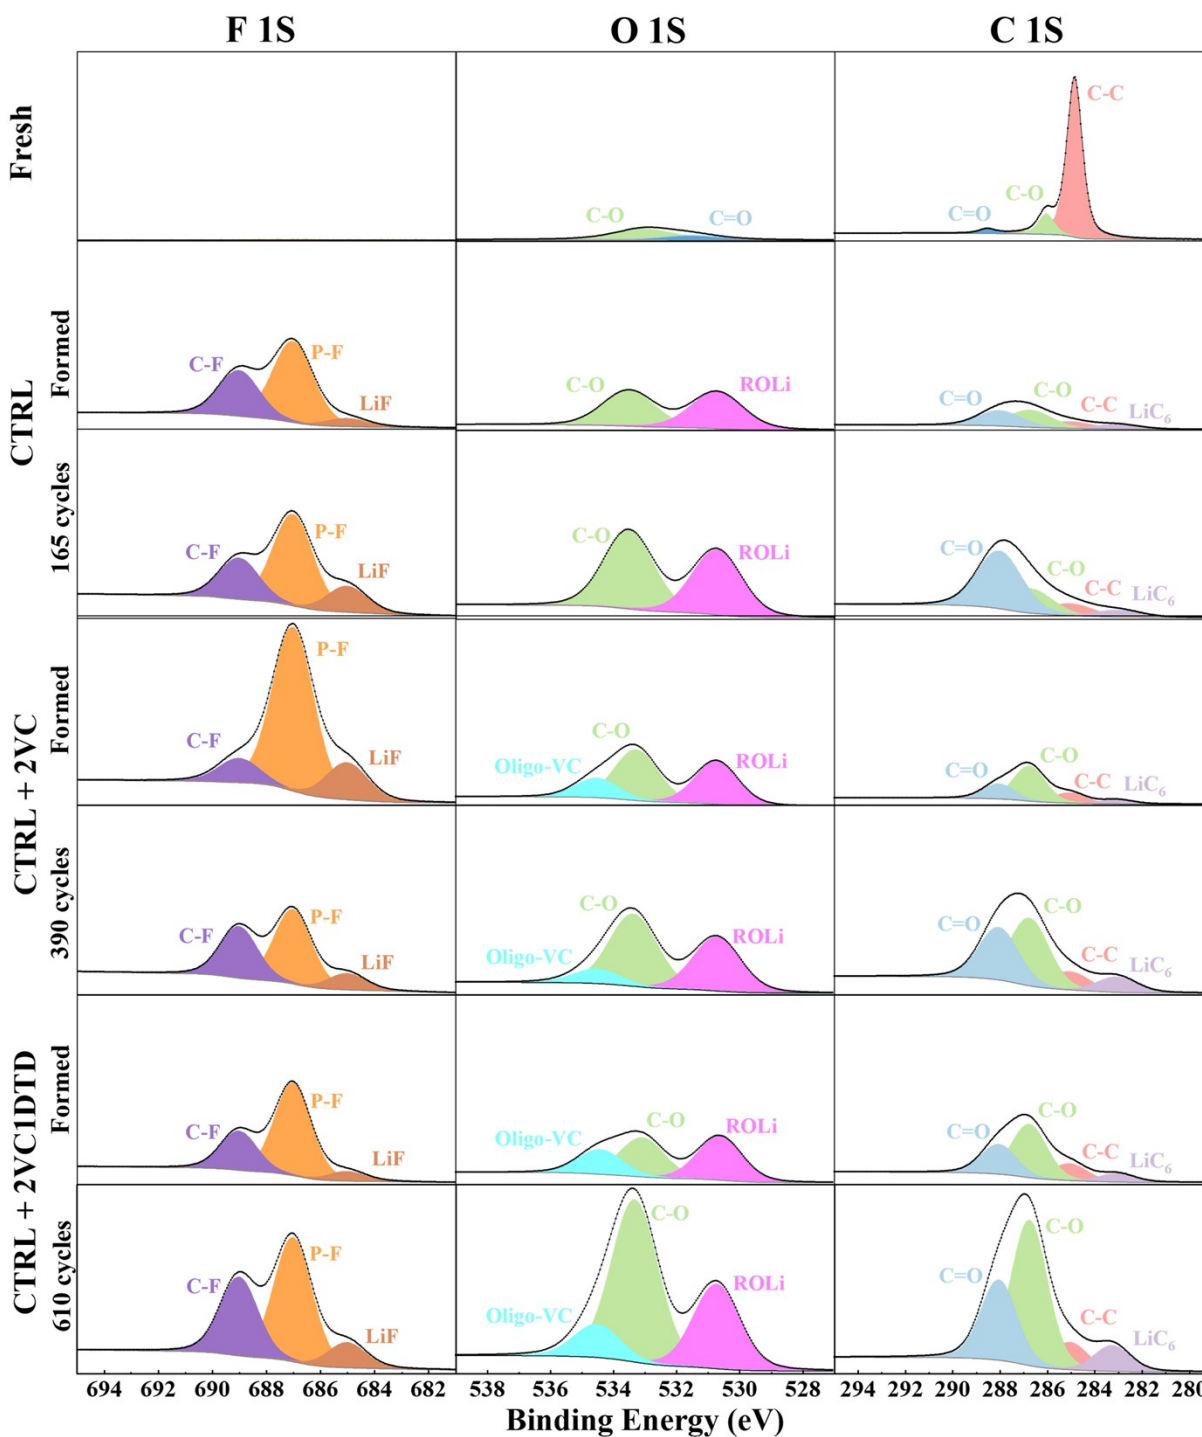

**Figure S8.** XPS data for graphite electrodes extracted from fresh, formed, and cycled pouch cells. Formed cells were formed to 4.2 V; cycled cells were cycled between 3.0 V and 4.2 V; all formed and cycled cells were disassembled at 3.9 V and contained CTRL, CTRL+2VC, or CTRL+2VC1DTD electrolyte. Each row contains data from one electrode sample. F 1s, O 1s, and C 1s spectra are shown. The y-axis scales are equal for spectra of the same type (columns). Components are labeled based on binding energy and literature assignments (**Table S12**).

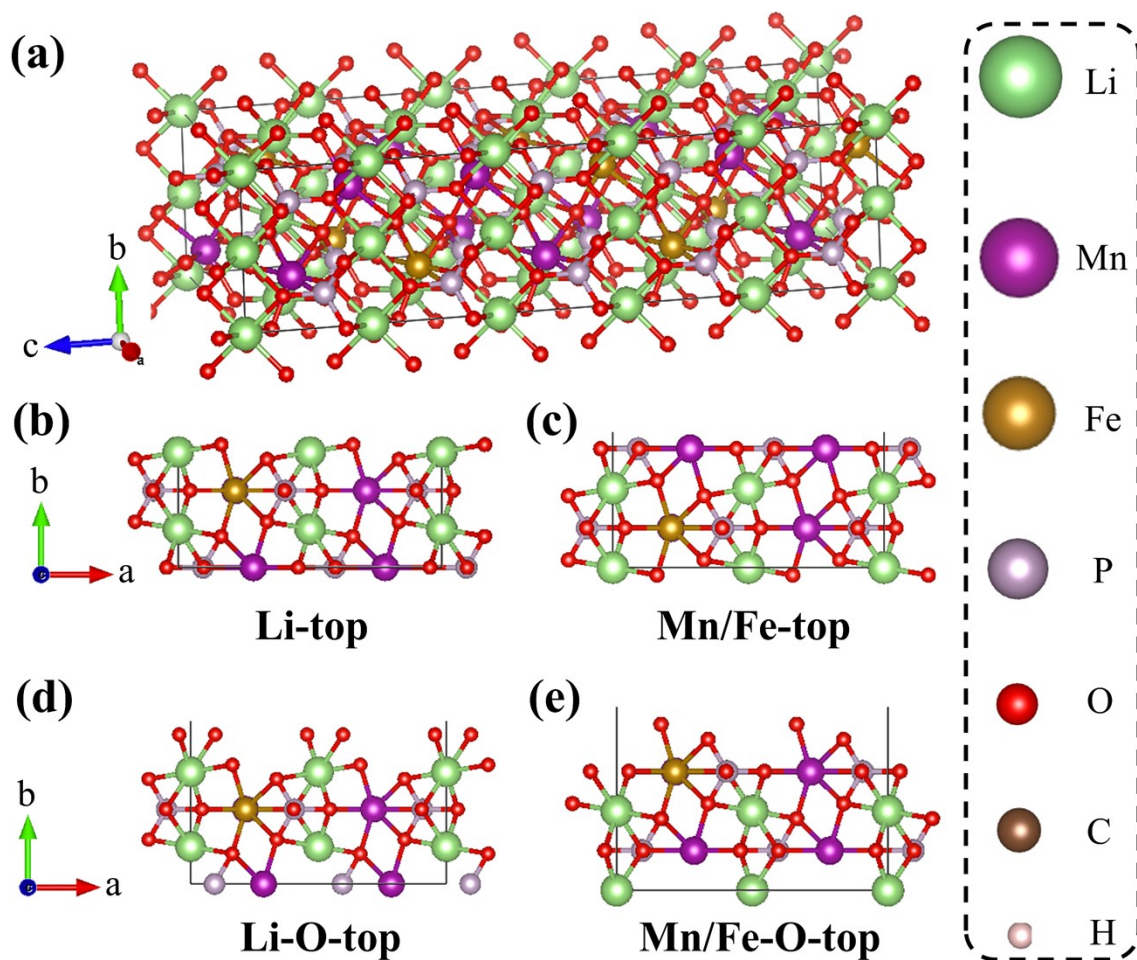

**Figure S9.** (a) Expanded unit cell of  $\text{LiMn}_{0.6}\text{Fe}_{0.4}\text{PO}_4$  to remove partial atom occupations. Four different types of (010) lattice surfaces are shown: (b) Li-top, (c) Mn/Fe-top, (d) Li-O-top, and (e) Mn/Fe-O-top.

**Table S1.** The best fit parameters for the *ex situ* LiMn<sub>0.6</sub>Fe<sub>0.4</sub>PO<sub>4</sub> pristine  
 $E_0 = 3.71 \pm 2.93$ ,  $S_0^2 = 1.053 \pm 0.288$ , R-factor = 0.0038

| Sphere          | Bond  | N | R, Å    | sigma, 10 <sup>-3</sup> Å |
|-----------------|-------|---|---------|---------------------------|
| 1 <sup>st</sup> | Fe-O  | 2 | 2.01435 | 2.53                      |
| 1 <sup>st</sup> | Fe-O  | 1 | 2.11335 | 1.66                      |
| 1 <sup>st</sup> | Fe-O  | 1 | 2.21067 | 0.74                      |
| 2 <sup>nd</sup> | Fe-P  | 1 | 2.83298 | 6.24                      |
| 2 <sup>nd</sup> | Fe-P  | 1 | 3.20688 | 203.2                     |
| 2 <sup>nd</sup> | Fe-P  | 3 | 3.24557 | 7.96                      |
| 3 <sup>rd</sup> | Fe-TM | 4 | 3.83663 | 26.72                     |
| 3 <sup>rd</sup> | Fe-TM | 2 | 4.66033 | 9.65                      |

**Table S2.** The best fit parameters for the *ex situ* LiMn<sub>0.6</sub>Fe<sub>0.4</sub>PO<sub>4</sub> 3.00V vs. Li<sup>+</sup>/Li  
 $E_0 = 12.42 \pm 3.42$ ,  $S_0^2 = 1.431 \pm 1.399$ , R-factor = 0.0029

| Sphere          | Bond  | N | R, Å    | sigma, 10 <sup>-3</sup> Å |
|-----------------|-------|---|---------|---------------------------|
| 1 <sup>st</sup> | Fe-O  | 2 | 2.00738 | 7.95                      |
| 1 <sup>st</sup> | Fe-O  | 1 | 2.10730 | 7.09                      |
| 1 <sup>st</sup> | Fe-O  | 1 | 2.20434 | 71.27                     |
| 2 <sup>nd</sup> | Fe-P  | 1 | 2.82486 | 9.41                      |
| 2 <sup>nd</sup> | Fe-P  | 1 | 3.19770 | 36.12                     |
| 2 <sup>nd</sup> | Fe-P  | 3 | 3.23627 | 17.61                     |
| 3 <sup>rd</sup> | Fe-TM | 4 | 3.82564 | 19.95                     |
| 3 <sup>rd</sup> | Fe-TM | 2 | 4.64698 | 15.27                     |

**Table S3.** The best fit parameters for the *ex situ* LiMn<sub>0.6</sub>Fe<sub>0.4</sub>PO<sub>4</sub> 3.65V vs. Li<sup>+</sup>/Li  
 $E_0 = 4.45 \pm 2.55$ ,  $S_0^2 = 2.578 \pm 0.829$ , R-factor = 0.0056

| Sphere          | Bond  | N | R, Å    | sigma, 10 <sup>-3</sup> Å |
|-----------------|-------|---|---------|---------------------------|
| 1 <sup>st</sup> | Fe-O  | 2 | 2.01126 | 8.78                      |
| 1 <sup>st</sup> | Fe-O  | 1 | 2.11099 | 52.46                     |
| 1 <sup>st</sup> | Fe-O  | 1 | 2.20820 | 232.88                    |
| 2 <sup>nd</sup> | Fe-P  | 1 | 2.82981 | 15.02                     |
| 2 <sup>nd</sup> | Fe-P  | 1 | 3.20330 | 19.13                     |
| 2 <sup>nd</sup> | Fe-P  | 3 | 3.24194 | 24.31                     |
| 3 <sup>rd</sup> | Fe-TM | 4 | 3.83234 | 30.45                     |
| 3 <sup>rd</sup> | Fe-TM | 2 | 4.65512 | 18.85                     |

**Table S4.** The best fit parameters for the *ex situ* LiMn<sub>0.6</sub>Fe<sub>0.4</sub>PO<sub>4</sub> 4.20V vs. Li<sup>+</sup>/Li  
 $E_0 = 4.43 \pm 3.28$ ,  $S_0^2 = 1.754 \pm 0.646$ , R-factor = 0.0175

| Sphere          | Bond  | N | R, Å    | sigma, 10 <sup>-3</sup> Å |
|-----------------|-------|---|---------|---------------------------|
| 1 <sup>st</sup> | Fe-O  | 2 | 1.93860 | 4.88                      |
| 1 <sup>st</sup> | Fe-O  | 1 | 2.08908 | 3.01                      |
| 1 <sup>st</sup> | Fe-O  | 1 | 2.18529 | 37.39                     |
| 2 <sup>nd</sup> | Fe-P  | 1 | 2.80045 | 9.60                      |
| 2 <sup>nd</sup> | Fe-P  | 1 | 3.17006 | 5.39                      |
| 2 <sup>nd</sup> | Fe-P  | 3 | 3.20830 | 32.20                     |
| 3 <sup>rd</sup> | Fe-TM | 4 | 3.79257 | 17.46                     |
| 3 <sup>rd</sup> | Fe-TM | 2 | 4.60681 | 14.00                     |

**Table S5.** The best fit parameters for the *ex situ* LiMn<sub>0.6</sub>Fe<sub>0.4</sub>PO<sub>4</sub> pristine  
 $E_0 = 3.71 \pm 2.93$ ,  $S_0^2 = 1.053 \pm 0.288$ , R-factor = 0.0038

| Sphere          | Bond  | N | R, Å    | sigma, 10 <sup>-3</sup> Å |
|-----------------|-------|---|---------|---------------------------|
| 1 <sup>st</sup> | Mn-O  | 2 | 2.01435 | 2.53                      |
| 1 <sup>st</sup> | Mn-O  | 1 | 2.11335 | 1.66                      |
| 1 <sup>st</sup> | Mn-O  | 1 | 2.21067 | 0.74                      |
| 2 <sup>nd</sup> | Mn-P  | 1 | 2.83298 | 6.24                      |
| 2 <sup>nd</sup> | Mn-P  | 1 | 3.20688 | 203.2                     |
| 2 <sup>nd</sup> | Mn-P  | 3 | 3.24557 | 7.96                      |
| 3 <sup>rd</sup> | Mn-TM | 4 | 3.83663 | 26.72                     |
| 3 <sup>rd</sup> | Mn-TM | 2 | 4.66033 | 9.65                      |

**Table S6.** The best fit parameters for the *ex situ* LiMn<sub>0.6</sub>Fe<sub>0.4</sub>PO<sub>4</sub> 3.00V vs. Li<sup>+</sup>/Li  
 $E_0 = 12.42 \pm 3.42$ ,  $S_0^2 = 1.431 \pm 1.399$ , R-factor = 0.0029

| Sphere          | Bond  | N | R, Å    | sigma, 10 <sup>-3</sup> Å |
|-----------------|-------|---|---------|---------------------------|
| 1 <sup>st</sup> | Mn-O  | 2 | 2.00738 | 7.95                      |
| 1 <sup>st</sup> | Mn-O  | 1 | 2.10730 | 7.09                      |
| 1 <sup>st</sup> | Mn-O  | 1 | 2.20434 | 71.27                     |
| 2 <sup>nd</sup> | Mn-P  | 1 | 2.82486 | 9.41                      |
| 2 <sup>nd</sup> | Mn-P  | 1 | 3.19770 | 36.12                     |
| 2 <sup>nd</sup> | Mn-P  | 3 | 3.23627 | 17.61                     |
| 3 <sup>rd</sup> | Mn-TM | 4 | 3.82564 | 19.95                     |
| 3 <sup>rd</sup> | Mn-TM | 2 | 4.64698 | 15.27                     |



**Table S7.** The best fit parameters for the *ex situ* LiMn<sub>0.6</sub>Fe<sub>0.4</sub>PO<sub>4</sub> 3.65V vs. Li<sup>+</sup>/Li  
 $E_0 = 4.45 \pm 2.55$ ,  $S_0^2 = 2.578 \pm 0.829$ , R-factor = 0.0056

| Sphere          | Bond  | N | R, Å    | sigma, 10 <sup>-3</sup> Å |
|-----------------|-------|---|---------|---------------------------|
| 1 <sup>st</sup> | Mn-O  | 2 | 2.01126 | 8.78                      |
| 1 <sup>st</sup> | Mn-O  | 1 | 2.11099 | 52.46                     |
| 1 <sup>st</sup> | Mn-O  | 1 | 2.20820 | 232.88                    |
| 2 <sup>nd</sup> | Mn-P  | 1 | 2.82981 | 15.02                     |
| 2 <sup>nd</sup> | Mn-P  | 1 | 3.20330 | 19.13                     |
| 2 <sup>nd</sup> | Mn-P  | 3 | 3.24194 | 24.31                     |
| 3 <sup>rd</sup> | Mn-TM | 4 | 3.83234 | 30.45                     |
| 3 <sup>rd</sup> | Mn-TM | 2 | 4.65512 | 18.85                     |

**Table S8.** The best fit parameters for the *ex situ* LiMn<sub>0.6</sub>Fe<sub>0.4</sub>PO<sub>4</sub> 4.20V vs. Li<sup>+</sup>/Li  
 $E_0 = 8.56 \pm 2.45$ ,  $S_0^2 = 2.044 \pm 0.631$ , R-factor = 0.0069

| Sphere          | Bond  | N | R, Å    | sigma, 10 <sup>-3</sup> Å |
|-----------------|-------|---|---------|---------------------------|
| 1 <sup>st</sup> | Mn-O  | 2 | 1.96259 | 34.80                     |
| 1 <sup>st</sup> | Mn-O  | 1 | 2.14113 | 83.12                     |
| 1 <sup>st</sup> | Mn-O  | 1 | 2.23973 | 25.79                     |
| 2 <sup>nd</sup> | Mn-P  | 1 | 2.87022 | 31.28                     |
| 2 <sup>nd</sup> | Mn-P  | 1 | 3.24904 | 40.43                     |
| 2 <sup>nd</sup> | Mn-P  | 3 | 3.28824 | 56.24                     |
| 3 <sup>rd</sup> | Mn-TM | 4 | 3.88707 | 39.39                     |
| 3 <sup>rd</sup> | Mn-TM | 2 | 4.72159 | 33.64                     |

**Table S9.** Summary of  $R_{ct}$  values for  $\text{LiMn}_{0.6}\text{Fe}_{0.4}\text{PO}_4/\text{LiMn}_{0.6}\text{Fe}_{0.4}\text{PO}_4$  and graphite/graphite symmetric cells, as well as  $\text{LiMn}_{0.6}\text{Fe}_{0.4}\text{PO}_4/\text{graphite}$  pouch cells after formation at 3.90 V, obtained from equivalent circuit fitting at 10 °C. The equivalent circuit can be referred to Figure S1.

| Electrolytes | Pouch<br>( $\Omega \text{ cm}^2$ ) | +/+ /2<br>( $\Omega \text{ cm}^2$ ) | -/- /2<br>( $\Omega \text{ cm}^2$ ) |
|--------------|------------------------------------|-------------------------------------|-------------------------------------|
| CTRL         | 62.59                              | 26.32                               | 34.90                               |
| CTRL+2VC     | 96.54                              | 27.52                               | 54.75                               |
| CTRL+2VC1DTD | 100.7                              | 58.65                               | 32.56                               |

**Table S10.** Summary of  $R_{ct}$  values for  $\text{LiMn}_{0.6}\text{Fe}_{0.4}\text{PO}_4/\text{LiMn}_{0.6}\text{Fe}_{0.4}\text{PO}_4$  and graphite/graphite symmetric cells, as well as  $\text{LiMn}_{0.6}\text{Fe}_{0.4}\text{PO}_4/\text{graphite}$  pouch cells after long-term cycling at 3.90 V, obtained from equivalent circuit fitting at 10 °C. The equivalent circuit can be referred to Figure S1

| Electrolytes | Pouch<br>( $\Omega \text{ cm}^2$ ) | +/+ /2<br>( $\Omega \text{ cm}^2$ ) | -/- /2<br>( $\Omega \text{ cm}^2$ ) |
|--------------|------------------------------------|-------------------------------------|-------------------------------------|
| CTRL         | 170.4                              | 120.7                               | 46.38                               |
| CTRL+2VC     | 186.3                              | 131.2                               | 64.13                               |
| CTRL+2VC1DTD | 204.4                              | 170.5                               | 38.20                               |

**Table S11.** Summary of increase rate of  $R_{ct}$  per cycle for  $\text{LiMn}_{0.6}\text{Fe}_{0.4}\text{PO}_4/\text{LiMn}_{0.6}\text{Fe}_{0.4}\text{PO}_4$  and graphite/graphite symmetric cells, as well as  $\text{LiMn}_{0.6}\text{Fe}_{0.4}\text{PO}_4$ /graphite pouch cells.

| Electrolytes | Pouch<br>( $\Omega \text{ cm}^2 \text{ cycle}^{-1}$ ) | +/+ /2<br>( $\Omega \text{ cm}^2 \text{ cycle}^{-1}$ ) | -/- /2<br>( $\Omega \text{ cm}^2 \text{ cycle}^{-1}$ ) |
|--------------|-------------------------------------------------------|--------------------------------------------------------|--------------------------------------------------------|
| CTRL         | 0.6534                                                | 0.5720                                                 | 0.0696                                                 |
| CTRL+2VC     | 0.2274                                                | 0.2625                                                 | 0.02375                                                |
| CTRL+2VC1DTD | 0.1700                                                | 0.18336                                                | 0.0092                                                 |

**Table S12.** Binding energies of peak assignment in the XPS spectra (**Figure S8**)

| Peaks | Binding energy (eV)           | Species          |
|-------|-------------------------------|------------------|
| F 1s  | 689 <sup>6, 7</sup>           | C-F              |
|       | 687 <sup>4, 8</sup>           | P-F              |
|       | 685 <sup>4, 8</sup>           | LiF              |
| O 1s  | 534.5 <sup>9, 10</sup>        | Oligo VC         |
|       | 533-533.5 <sup>4, 9, 10</sup> | C-O              |
|       | 530.7 <sup>9, 10</sup>        | ROLi             |
| C 1s  | 288 <sup>4, 11</sup>          | C=O/C-O=O        |
|       | 286.7 <sup>4, 11</sup>        | C-O/C-O-C        |
|       | 285 <sup>10, 11</sup>         | C-C/C-H          |
|       | 283 <sup>9, 10</sup>          | LiC <sub>6</sub> |

**Table S13.** Energy information for the four different types of (010) lattice surfaces: Li-top, Mn/Fe-top, Li-O-top, and Mn/Fe-O-top

| Surface type | Atom Movement<br>Restriction | DFT Total Energy (eV) | Relative Energy<br>(eV) |
|--------------|------------------------------|-----------------------|-------------------------|
| Li-top       | 1 layer at Bottom            | -100460.217           | 73.486                  |
| Mn/Fe-top    | 1 layer at Bottom            | -100533.685           | 0.000                   |
| Li-O-top     | 1 layer at Bottom            | -100441.305           | 92.380                  |
|              | 2 layers at Bottom           | -100456.313           | 77.371                  |
| Mn/Fe-O-top  | 1 layer at Bottom            | -100518.895           | 14.790                  |
|              | 2 layers at Bottom           | -100510.980           | 22.704                  |

## References

1. Levit, O.; Xu, P.; Shvartsev, B.; Avioz Cohen, G.; Stanciu, L.; Tsur, Y.; Ein-Eli, Y., Interphases Formation and Analysis at the Lithium–Aluminum–Titanium–Phosphate (LATP) and Lithium–Manganese Oxide Spinel (LMO) Interface during High-Temperature Bonding. *Energy Technology* **2020**, *8* (12), 2000634.
2. Jayakumar, R.; Pollard, T. P.; Borodin, O.; Shipitsyn, V.; Chak, C.; Pastel, G.; Zheng, A.; Johnson, M.; Hasan, F.; Beijger, C. M.; Schroeder, M. A.; Greenbaum, S. G.; Zuo, W.; Ma, L., Weakly solvating ester electrolyte for high voltage sodium-ion batteries. *Nano Energy* **2024**, *128*, 109969.
3. Keefe, A. S.; Buteau, S.; Hill, I. G.; Dahn, J. R., Temperature Dependent EIS Studies Separating Charge Transfer Impedance from Contact Impedance in Lithium-Ion Symmetric Cells. *Journal of The Electrochemical Society* **2019**, *166* (14), A3272.
4. Keefe, A. S.; Weber, R.; Hill, I. G.; Dahn, J. R., Studies of the SEI layers in Li(Ni<sub>0.5</sub>Mn<sub>0.3</sub>Co<sub>0.2</sub>)O<sub>2</sub>/Artificial Graphite Cells after Formation and after Cycling. *Journal of The Electrochemical Society* **2020**, *167* (12), 120507.
5. Chen, C. H.; Liu, J.; Amine, K., Symmetric cell approach and impedance spectroscopy of high power lithium-ion batteries. *Journal of Power Sources* **2001**, *96* (2), 321-328.
6. Wu, M.-S.; Zhang, X.-P.; Li, C.-Y.; Wang, Q.-Y.; Rong, Y.-J.; Liao, Y.-L.; Gao, M.-L.; Chen, W.-R., Stabilizing Lithium-Oxygen Batteries through In Situ Generated Phenyl/LiF-Rich Hybrid SEI Layer with Sulfonyl Fluoride Electrolyte Additive. *Journal of The Electrochemical Society* **2024**, *171* (2), 020554.
7. Zhang, S.; Li, W.-J.; Ling, S.-G.; Li, H.; Zhou, Z.-B.; Chen, L.-Q., Instability of lithium bis(fluorosulfonyl)imide (LiFSI)–potassium bis(fluorosulfonyl)imide (KFSI) system with LiCoO<sub>2</sub> at high voltage\*. *Chinese Physics B* **2015**, *24* (7), 078201.
8. Ma, X.; Young, R. S.; Ellis, L. D.; Ma, L.; Li, J.; Dahn, J. R., 1,2,6-Oxadithiane 2,2,6,6-tetraoxide as an Advanced Electrolyte Additive for Li[Ni<sub>0.5</sub>Mn<sub>0.3</sub>Co<sub>0.2</sub>]O<sub>2</sub>/Graphite Pouch Cells. *Journal of The Electrochemical Society* **2019**, *166* (12), A2665.
9. Madec, L.; Petibon, R.; Xia, J.; Sun, J. P.; Hill, I. G.; Dahn, J. R., Understanding the Role of Prop-1-ene-1,3-Sultone and Vinylene Carbonate in LiNi<sub>1/3</sub>Mn<sub>1/3</sub>Co<sub>1/3</sub>O<sub>2</sub>/Graphite Pouch Cells: Electrochemical, GC-MS and XPS Analysis. *Journal of The Electrochemical Society* **2015**, *162* (14), A2635.
10. Madec, L.; Xia, J.; Petibon, R.; Nelson, K. J.; Sun, J.-P.; Hill, I. G.; Dahn, J. R., Effect of Sulfate Electrolyte Additives on LiNi<sub>1/3</sub>Mn<sub>1/3</sub>Co<sub>1/3</sub>O<sub>2</sub>/Graphite Pouch Cell Lifetime: Correlation between XPS Surface Studies and Electrochemical Test Results. *The Journal of Physical Chemistry C* **2014**, *118* (51), 29608-29622.
11. Chen, X.; Wang, X.; Fang, D., A review on C1s XPS-spectra for some kinds of carbon materials. *Fullerenes, Nanotubes and Carbon Nanostructures* **2020**, *28* (12), 1048-1058.
